# Supplementary material
Source: PubMed Central journal article supplement (PMC7309436)
Supplement: NIHMS1598845-supplement-1.pdf [file NIHMS1598845-supplement-1.pdf]

## Supplemental Figures

### **Group 2 Innate Lymphoid Cells Promote Development of T follicular Helper (Tfh) Cells and Initiate Allergic Sensitization to Peanuts**

Running Title: Role of ILC2s in Development of Peanut Allergy

James W. Krempski, M.S.<sup>\*</sup>, Takao Kobayashi, Ph.D.<sup>†</sup>, Koji Iijima, Ph.D.<sup>†</sup>, Andrew N.  
McKenzie, Ph.D.<sup>‡</sup>, Hirohito Kita, M.D.<sup>\*,†</sup>

<sup>\*</sup>Department of Immunology, Mayo Clinic, Rochester, MN 55905

<sup>†</sup>Division of Allergic Diseases and Department of Medicine, Mayo Clinic, Scottsdale, AZ 85259

<sup>‡</sup>MRC Laboratory of Molecular Biology, Cambridge, CB2 0QH, UK

Corresponding author: Hirohito Kita, M.D., Division of Allergic Diseases and Department of  
Medicine, Mayo Clinic Arizona, 13400 E Shea Blvd, Scottsdale, AZ 85259, USA, Telephone:  
480-301-9616, Fax: 480-301-7017, E-mail: [kita.hirohito@mayo.edu](mailto:kita.hirohito@mayo.edu)

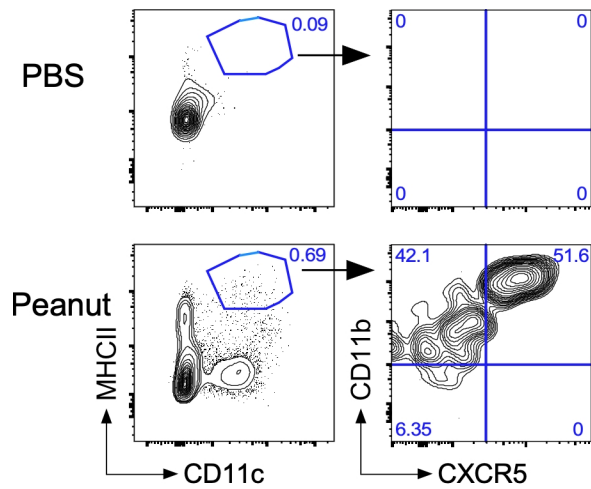

Supplemental Figure 1

**Supplemental Figure 1.** The CD11c<sup>+</sup>MHCII<sup>hi</sup> DC population expresses CD11b and CXCR5. WT mice were exposed to peanut flour or PBS on days 0 and 1 as described in Fig 3A, and mediastinal lymph nodes were collected on day 4. Sample flow plots for CD11c<sup>+</sup>MHCII<sup>hi</sup> population and CD11b<sup>+</sup>CXCR5<sup>+</sup> population are shown. The cells were gated on the CD45<sup>+</sup>, singlet, living, high FSC-A/SSC-A population.

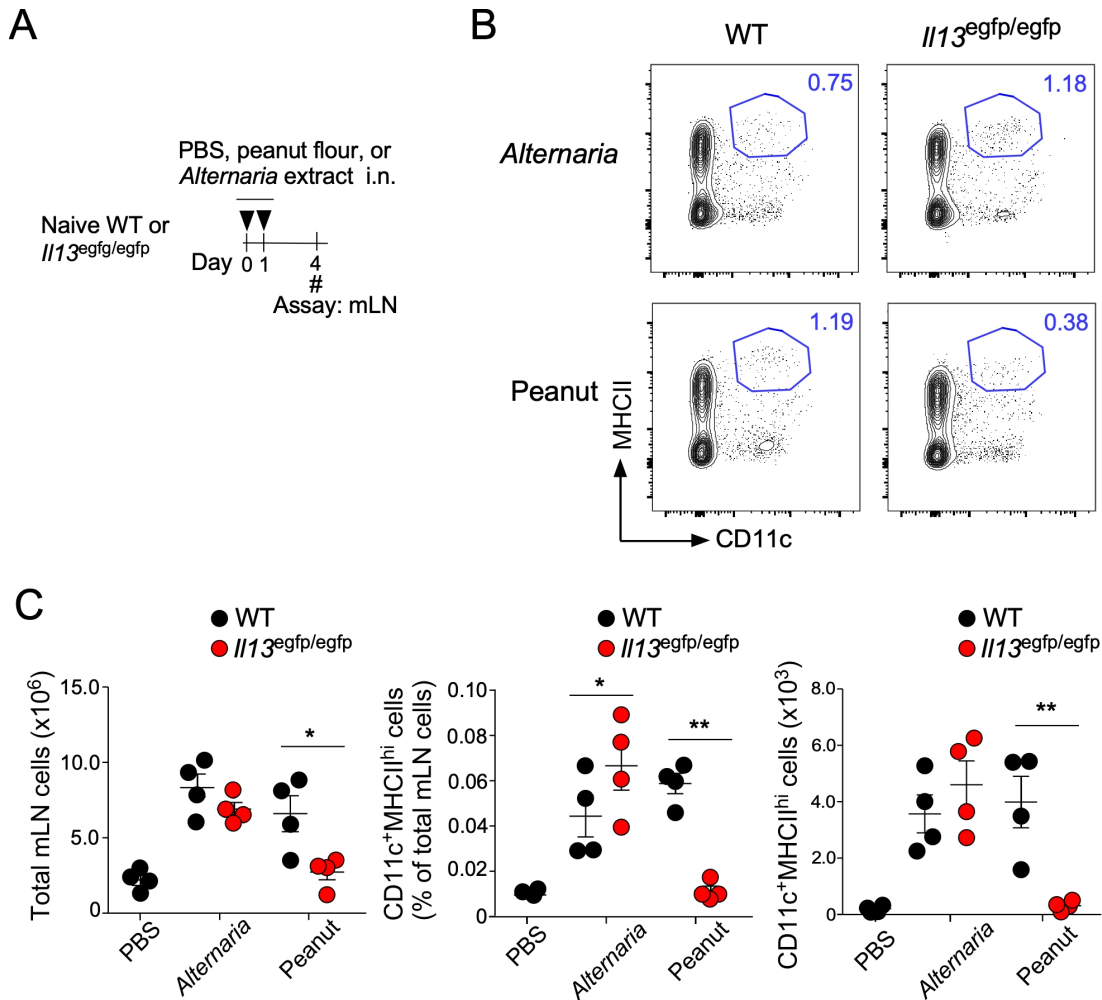

Supplemental Figure 2

**Supplemental Figure 2.** IL-13 deficiency does not affect the number of CD11c<sup>hi</sup>MHCII<sup>hi</sup> DCs in mediastinal lymph nodes (mLNs) after *Alternaria* extract exposure. **A.** WT and IL-13-deficient (i.e. *Il13*<sup>egfp/egfp</sup>) BALB/c mice were exposed i.n. to peanut flour, *Alternaria* extract, or PBS on days 0 and 1. On day 4, mLN were harvested and analyzed by flow cytometry. **B.** Representative gating strategy for each experimental group, preceded by gating on the CD45<sup>+</sup>, singlet, living, high FSC-A/SSC-A cell population. **C.** Data represent total numbers of mLN cells and frequency and cell counts for the CD11c<sup>+</sup>MHCII<sup>hi</sup> population. \* $P < 0.05$  and \*\* $P < 0.01$  between the groups indicated by horizontal lines. Each circle represents individual mouse.

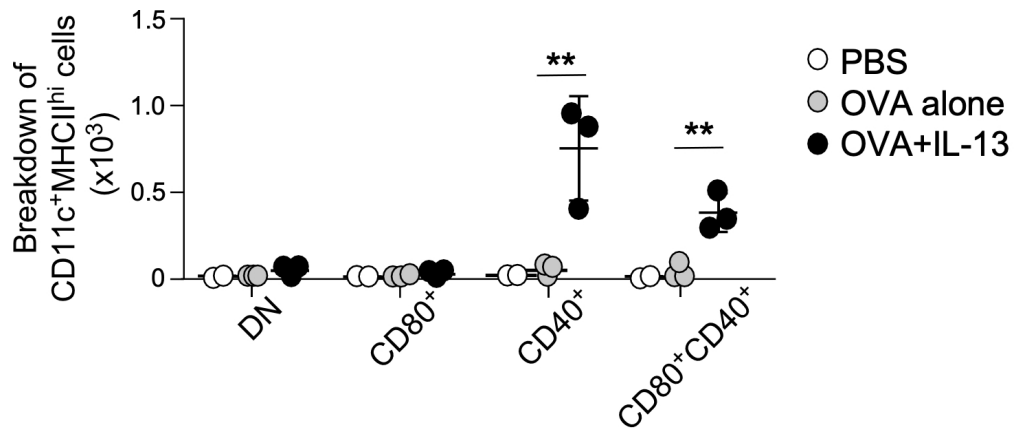

**Supplemental Figure 3**

**Supplemental Figure 3.** IL-13 in the presence of OVA antigen increases CD40<sup>+</sup> and CD80<sup>+</sup>CD40<sup>+</sup> CD11c<sup>+</sup>MHCII<sup>hi</sup> DCs in mLNs. WT BALB/c mice were exposed i.n. to IL-13+OVA, OVA alone, or PBS for on days 0 and 1. On day 4, mLNs were harvested and analyzed by flow cytometry. Data represent cell counts (mean ± SEM) for the double-negative (DN), CD80<sup>+</sup> or CD40<sup>+</sup> single-positive, and CD80<sup>+</sup>CD40<sup>+</sup> double-positive populations in CD11c<sup>+</sup>MHCII<sup>hi</sup> DCs. \*\**P*<0.01 between the groups indicated by horizontal lines. Each circle represents individual mouse.

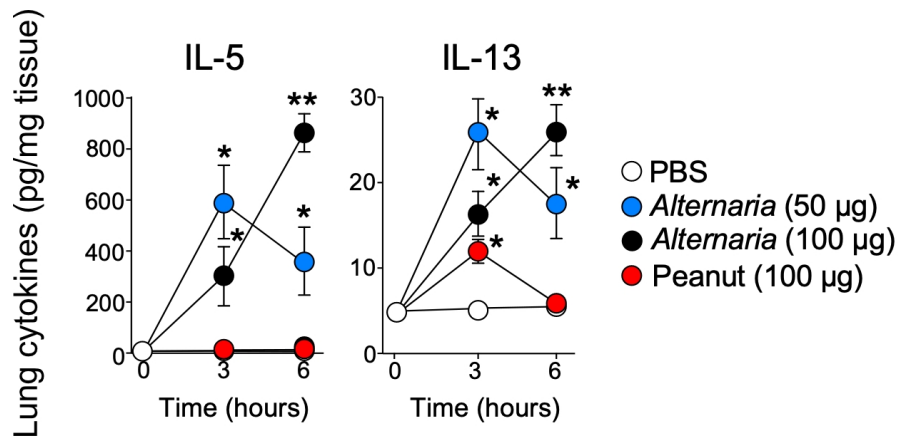

Supplemental Figure 4

**Supplemental Figure 4.** *Alternaria* extract induces robust type 2 cytokine production after airway exposure. **A.** WT BALB/c mice were exposed once to peanut flour (100 µg/dose) or *Alternaria* extract (50 µg/dose or 100 µg/dose) or PBS. Lungs were harvested 3 or 6 hours later, and IL-5 and IL-13 levels from lung lysate were assessed by ELISA. Data represent mean ± SEM from an experiment with 3–5 mice/group. \* $P < 0.05$  and \*\* $P < 0.01$  compared to the mice exposed to PBS.

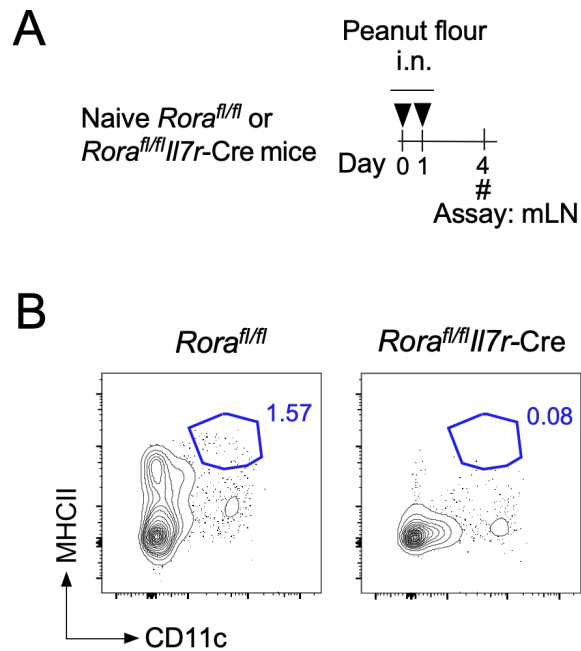

Supplemental Figure 5

**Supplemental Figure 5.** Decreased CD11c<sup>+</sup>MHCII<sup>hi</sup> DC population in mLNs in *Rora<sup>fl/fl</sup>Il7r-Cre* mice. **A.** *Rora<sup>fl/fl</sup>Il7r-Cre* mice or *Rora<sup>fl/fl</sup>* control mice were exposed to peanut flour on days 0 and 1 as described in Fig 3A, and mediastinal lymph nodes were collected on day 4. **B.** Sample flow plots for CD11c<sup>+</sup>MHCII<sup>hi</sup> population are shown. The cells were gated on the CD45<sup>+</sup>, singlet, living, high FSC-A/SSC-A population.
